# Supplementary material for: The association of the systemic immune-inflammation index and stent thrombosis in myocardial infarction patients after coronary stent implantation—a retrospectively study
Source: PubMed Central journal article supplement — J Thorac Dis. 2023 Apr 27;15(4):1726–33. doi: 10.21037/jtd-23-363 (PMC10183534; doi:10.21037/jtd-23-363), 2023-04-27
Supplement: jtd-15-04-1726-dss.pdf [file jtd-15-04-1726-dss.pdf]

## Data Sharing Statement

|                     |                                                                                                                                                     |                                                                                                                    |
|---------------------|-----------------------------------------------------------------------------------------------------------------------------------------------------|--------------------------------------------------------------------------------------------------------------------|
| <b>Article Info</b> | <a href="https://dx.doi.org/10.21037/jtd-23-363">https://dx.doi.org/10.21037/jtd-23-363</a>                                                         |                                                                                                                    |
| <b>Item</b>         | <b>Question</b>                                                                                                                                     | <b>Authors' Response<br/>(place "-" if not applicable)</b>                                                         |
| 1                   | Would you like to share data collected for your study to others?                                                                                    | Yes                                                                                                                |
| 2                   | If not, would you like to share the reason for your decision?                                                                                       | -                                                                                                                  |
| 3                   | What data in particular will be shared?                                                                                                             | The data of the stent thrombosis in myocardial infarction patients after coronary stent implantation.              |
| 4                   | Any other documents will be shared? Such as study protocol, statistical analysis plan, informed consent form, clinical study report, analytic code. | Statistical analysis plan and clinical study report will also be shared if requested.                              |
| 5                   | When will data availability begin?                                                                                                                  | From the publication date.                                                                                         |
| 6                   | When will data availability end?                                                                                                                    | Two years within the publication date, since the technique may be updated over time.                               |
| 7                   | To whom will you share the data?                                                                                                                    | Doctors who are interested in myocardial infarction patients.                                                      |
| 8                   | For what type of analysis or purpose?                                                                                                               | For analysis to evaluate the stent thrombosis in myocardial infarction patients after coronary stent implantation. |
| 9                   | How or where can the data/documents be obtained?                                                                                                    | Emails could be sent to the address below to obtain the shared data:<br>zhangna20190421@sina.com.                  |
| 10                  | Any other restrictions?                                                                                                                             | We may balance the potential benefits and risks for each request and then provide the data that could be shared.   |
